# Supplementary material for: Mobile phone usage in patients with type II diabetes and their intention to use it for self-management: a cross-sectional study in Iran
Source: Springer Nature journal article supplement (doi:10.1186/s12911-020-1038-y), 2020-02-07
Supplement: MOESM1 [file 17661432]

**Demographic Information**

- 1- Gender:  Female  Male      2- Age (year):...      3- Place of residence:  Urban  Rural  
 4- Level of education:  High school  Diploma  Associate degree  undergraduate degree  Postgraduate and higher  
 5- Employment status:  Retired  Working Full- Time  Working Part Time  Housewife  Unemployed  Others

**Diabetes Management**

- 6- Height (cm)...      7- Weight (kg)...
- 8- How long have you been diagnosed with diabetes?  
 Less than 6 months     6 months to 1 year     1 year to 3years     3 to 5 years     Over 5 years     Don't know/ Not Applicable
- 9- Do you have any other chronic health condition?  Yes (name of disease.....)     No     Don't know
- 10- What area in your diabetes care do you find most difficult to manage or frustrating? (you can choose from several options)  
 Making healthy diet choices     Getting enough physical activity     Communicating with my physician  
 Communicating with other Health care Provider, such as dieticians, nurses, etc.     Communicating with friends and family  
 Taking and keeping track of my blood glucose levels     Not having clear and concrete goals for your diabetes     others.....

**Use of smartphone/cell phone and internet**

- 11- Do you own a cellphone?  Yes  No  
 12- Do you own a smart phone?(such as Android)  Yes  No  
 13- Do you have daily access to the internet at home?  Yes  No  
 14- On average, how many hours a day do you spent on the internet?  
 Less than one hour     Between 1 to 2 hours     Between 2-3 hours     Over 3 hours     Don't know  
 15- On average, how many hours a day do you spent on your smartphone or cell phone?  
 Less than one hour     Between 1 to 2 hours     Between 2-3 hours     Over 3 hours     Don't know  
 16- What activities do you typically use your smartphone (tablet) for? (you can choose from several options)  
 E-mailing     Communicating with friends     Social media such as telegram     Reading the news or books  
 Researching Information     Watching movie     internet shopping     others.....

**Your attitude to Diabetes self-management with using internet and smartphone application**

17- If you were to use an internet or smartphone application to help manage your diabetes, select what management services you would be interested in:

|                                                                                 | Don't know               | No                       | Yes                      |
|---------------------------------------------------------------------------------|--------------------------|--------------------------|--------------------------|
| Dietary planning                                                                | <input type="checkbox"/> | <input type="checkbox"/> | <input type="checkbox"/> |
| Physical activity planning                                                      | <input type="checkbox"/> | <input type="checkbox"/> | <input type="checkbox"/> |
| Text Messaging Monitoring and/ or Reminders                                     | <input type="checkbox"/> | <input type="checkbox"/> | <input type="checkbox"/> |
| Glucose Reading and Tracking options                                            | <input type="checkbox"/> | <input type="checkbox"/> | <input type="checkbox"/> |
| Communication with other people with Type2 Diabetes                             | <input type="checkbox"/> | <input type="checkbox"/> | <input type="checkbox"/> |
| Communication with diabetes clinicians                                          | <input type="checkbox"/> | <input type="checkbox"/> | <input type="checkbox"/> |
| Communicating with other Health care Provider, such as dieticians, nurses, etc. | <input type="checkbox"/> | <input type="checkbox"/> | <input type="checkbox"/> |

- 18- For me, using a specially developed smart phone application to assist with self-management would be:  
 Very bad idea     Bad idea     Neither a bad or good idea     Good idea     Very good idea
- 19- For me, using a specially developed smart phone application to assist with self-management would be:  
 Extremely unenjoyable     Unenjoyable     Neither unenjoyable or Enjoyable     Enjoyable     Very Enjoyable
- 20- For me, using a specially developed smart phone application to assist with self-management would be:  
 Very Frightening     Frightening     Neither Frightening or comforting     Comforting     Very comforting
- 21- For me, using a specially developed smart phone application to assist with self-management would be:  
 Very Boring     Boring     Neither Boring or Exciting     Exciting     Very Exciting
- 22- For me, using a specially developed smart phone application to assist with self-management would be:  
 Very Dull     Dull     Neither Dull or Interesting     Interesting     Very Interesting
- 23- For me, using a specially developed smart phone application to assist with self-management would be:  
 Very Unhelpful     Unhelpful     Neither Unhelpful or helpful     helpful     Very helpful
- 24- For me, using a specially developed smart phone application to assist with self-management would be:  
 Very time Consuming     Time Consuming     Neither time Consuming or time saving     time saving     Very time saving
- 25- I feel ....% confident that I could use a smart phone application to help me with my diabetes.  
 0% -20%     21% - 40%     41% - 60%     61% - 80%     81% - 100%
- 26- If you were unable to use a smart phone would you want a spouse/friend/ family member to help you manage your diabetes with a smart phone?  
 Yes     No
- 27- I intend to use a smart phone application for helping me with my diabetes management in the future.  
 Not at all     Very Little     Somewhat     A little     Very Much

**General comments and additional contact Request**

28- If you have any additional comments about using smart phone application manage diabetes, please state so here:  
 .....

29- Would you be willing to be contacted to further discuss your smart phone use in future?  Yes     No  
 (Please provide your name, phone number.....)

30- Would you be willing to be contacted to participate in any other study to management diabetes with use of smart phone?  
 Yes     No (please provide your name, phone number.....)
